# Supplementary material
Source: PubMed Central journal article supplement (PMC4278960)
Supplement: NIHMS650793-supplement-supplement_1.pdf [file NIHMS650793-supplement-supplement_1.pdf]

**Supplemental Table**

**Reasons for No and Late Colonoscopies (>6 months) after a Positive FOBT or Flexible Sigmoidoscopy  
Based on EHR Audits and Nurse Navigator Entries into the Study Database\***

|                                                 | No Colonoscopy |           | Late Colonoscopy (>6 months) |           | Events     |
|-------------------------------------------------|----------------|-----------|------------------------------|-----------|------------|
|                                                 | UC (n=8)       | Nav (n=2) | UC (n=6)                     | Nav (n=4) |            |
| Refused                                         | 3              | 1         | -                            | -         | 4          |
| Repetitively canceled or missed appointments    | 4              | -         | 2                            | 1         | 7          |
| Referred but not appointed until after 6 months | -              | -         | 3                            | -         | 3          |
| Cost concerns                                   | 1              | -         | -                            | 1         | 2          |
| Procedure concerns                              | -              | -         | 4                            | 2         | 6          |
| Too busy or other priorities                    | 1              | -         | 1                            | -         | 2          |
| Lost health insurance or changed coverage       | 1              | 1         | -                            | -         | 2          |
| Other health issues                             | -              | 1         | -                            | 2         | 3          |
|                                                 | <b>10</b>      | <b>3</b>  | <b>10</b>                    | <b>6</b>  | <b>29±</b> |

\*Participants could have more than one reason for not completing a colonoscopy or completing it late

±Number of reasons for either not completing a colonoscopy or completing it late
